# Supplementary material
Source: PubMed Central journal article supplement (PMC3490592)
Supplement: supp_pp.112.203968_203968Supplementary_Material_and_Methods_section.pdf [file supp_pp.112.203968_203968Supplementary_Material_and_Methods_section.pdf]

## Supplemental Material and Methods

### RNA isolation from *Nicotiana benthamiana* and Reverse Transcription reaction

Four days after *N. benthamiana* infiltration, leaf samples (100 mg) were taken and immediately frozen in liquid nitrogen. Tissue was grounded using a Mixer Mill MM400 (Retsch, Haan, Germany). RNA was isolated from the grounded tissue using TriFast Solution (Peqlab, Erlangen, Germany) according to the manufacturer's protocol. 1 µg of RNA was used for the Reverse Transcription reaction. The RNA was premixed with 0,5 µl random hexamer primer (1µg/ml) in a volume of 36 µl and incubated for 10 min at 80°C, 10 min at 60°C, 10 min at 40°C and 10 min at 20°C. The RNA-primer mixture was placed on ice and mixed with 25 nmol dNTPs, 2u RNasin, and 200u MMLV Reverse Transkriptase (Promega, Mannheim, Germany) in a reaction volume of 50 µl. The reaction mixtures were incubated for 10 min at 37°C, 60 min at 42°C and for 10 min at 80°C and finally placed on ice. 4 µl of the cDNA was used as a template in a PCR reaction using the Phusion Polymerase (NEB, Frankfurt, Germany) according to the manufacturer's protocol.

### Amplification and cloning of *Arabidopsis* PATs

All *Arabidopsis* PATs were amplified using either cDNAs from different *Arabidopsis thaliana* (Col-0 wild type) tissues (root, shoot or pollen from Col-0 wild type), an *Arabidopsis* cDNA two-hybrid library (Kim et al., 1997) or plasmids which contain isolated reading frames (provided either from RIKEN or from the Arabidopsis Resource Centre) (see Table 1). All AtPATs were inserted into a pGPTVII backbone plasmid using respective restriction sites in front of a GFP reading frame, which results in a PATx.GFP fusion.

AtPAT20 was not amplifiable from the available cDNA sources. Therefore, in contrast to the other PATs a genomic fragment (including the introns) of AtPAT20 was amplified from *Arabidopsis* genomic DNA (gDNA) and fused to GFP (Figure 1A). This gDNA-GFP fusion was used for initial localization analysis and expressed in *N. benthamiana* via *A. tumefaciens* mediated infiltration. Although using the genomic fragment, the protein fusion was well expressed (not shown), implicating that the introns are efficiently and correctly spliced out. To obtain a cDNA, RNA was extracted from the transiently expressing *N. benthamiana* leaves and AtPAT20 was re-amplified by RT-PCR. The obtained DNA fragment was clearly smaller than the genomic fragment and of the expected size showing correct splicing (Figure 1B). Moreover, sequencing of the re-amplified AtPAT20 cDNA fragment proofed the correct splicing and structure of the annotated reading frame.

## Amplification and cloning of AtCNX1, AtTPK1, AtGNT1

Arabidopsis CNX1, TPK1, GNT1 (AGI numbers see Table 1) were amplified using either cDNA (from Col-0 wt plants) or plasmids (see Table 1). All reading frames were inserted into a pGPTVII backbone plasmid using respective restriction sites either in front of a mCherry (TPK1, GNT1) or behind the mCherry reading frame (CNX1), respectively. Expression is driven by the mannopine synthase (MAS) promoter.

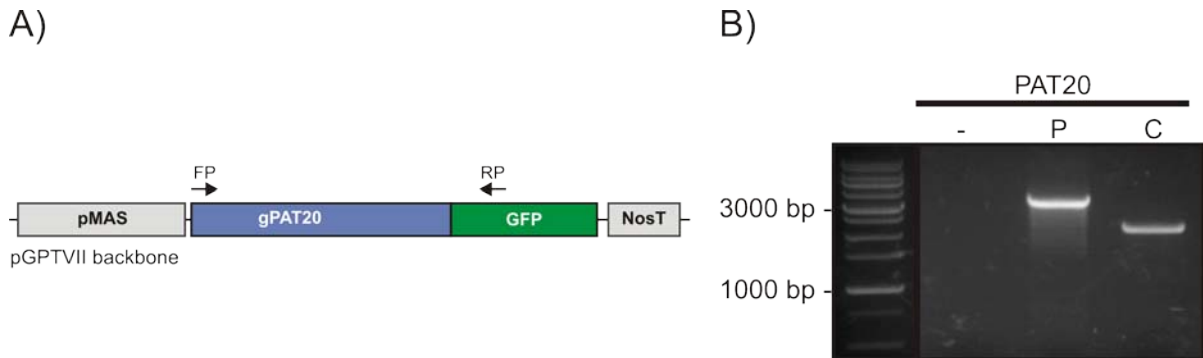

**Figure 1:**

A) Genomic fragment of PAT20 (gPAT20) from Arabidopsis was introduced into the pGPTVII plasmids and fused to the N-terminus of the GFP reading frame. (pMAS = MAS promoter; NosT = Nos terminator)

B) A PAT20 specific forward primer (FP) and a reverse primer (RP), which binds to the GFP reading frame (see A), were used to amplify PAT20 either from the plasmid generated (P = plasmid input) or from the cDNA (C = cDNA output) obtained from *Nicotiana benthamiana* leaves which were infiltrated with *A. tumefaciens* cells transformed with the respective plasmid. – = water control.

**Table 1:** Primers used in this work

| Primer  | primer sequence 5' → 3' (restriction sites underlined) | construct | Template                 |
|---------|--------------------------------------------------------|-----------|--------------------------|
| PAT1for | AAAAT <u>CTAG</u> AAAATGTCTTCTCAGAATCTTGAACG           | AtPAT01   | U87166 <sup>1</sup>      |
| PAT1rev | TTTT <u>CTCGAG</u> CCGTTCTCTAGCTTCGGAATC               |           |                          |
| PAT2for | TTTT <u>TCTAG</u> AAAATGGGGAGGAAGAAAAGCTG              | AtPAT02   | pollen cDNA <sup>3</sup> |
| PAT2rev | AAAAGGT <u>ACCC</u> TCGATCTCACATCAATGC                 |           |                          |
| PAT3for | TTTTCTAGATGAAAATGCAGAGGGAGAGAATGAGC                    | AtPAT03   | S63794 <sup>1</sup>      |
| PAT3rev | AAAAC <u>CCGGG</u> CTTGGGCAAGTCTAGTTGAGATG             |           |                          |
| PAT4for | AAAAT <u>CTAG</u> AAAATGGCTTGGGAATGAGACCAAAC           | AtPAT04   | cDNA library             |
| PAT4rev | AAAAC <u>TCGAG</u> TTTACGAAGCATTGGTGAAGTGG             |           |                          |
| PAT5for | TTTT <u>TCTAG</u> AAAATGTTAGATTTGCAGCCGTCAG            | AtPAT05   | root cDNA                |
| PAT5rev | TTTT <u>CCCGGG</u> TAACCGCCCTATACCAGTTCC               |           |                          |
| PAT6for | TTTT <u>ACTAG</u> TTGAAAATGTATGTGGTGACGCCTCC           | AtPAT06   | U10343 <sup>1</sup>      |
| PAT6rev | AAAAC <u>TCGAG</u> AGCTCTTCTTGCTGATAAGGC               |           |                          |
| PAT7for | TTTT <u>TCTAG</u> AAAATGTATGTAGTGCCTCCGCC              | AtPAT07   | pdz24089 <sup>2</sup>    |
| PAT7rev | AAAAC <u>CCGGG</u> TGTAGGCCGTTCTCCGTC                  |           |                          |
| PAT8for | TTTT <u>GGATC</u> CAAATGACACAACGGGTATTCCAAG            | AtPAT08   | cDNA library             |
| PAT8rev | AAAAC <u>CCGGG</u> TCCCCTTCCATCCTTTGCTG                |           |                          |
| PAT9for | TTTT <u>ACTAG</u> TTGAAAATGGCTGGACGGGTCTTCG            | AtPAT09   | U18817 <sup>1</sup>      |
| PAT9rev | AAAAC <u>TCGAG</u> CCGTCCTCCTCTGCAG                    |           |                          |

|           |                                        |                     |                                    |
|-----------|----------------------------------------|---------------------|------------------------------------|
| PAT10for  | TTTGGATCCAAAATGGGCGTTTGTGTCCTTTC       | AtPAT10             | cDNA library                       |
| PAT10rev  | AAAACCCGGGGCAGCAGCGACATTTCAAC          |                     |                                    |
| PAT11for  | TTTTCTAGAAAAATGGAAGATTCTCCAGGGG        | AtPAT11             | cDNA library                       |
| PAT11rev  | AAAACCCGGGTGTCTTATGTCTCTTCCTCAAG       |                     |                                    |
| PAT12for  | TTTTTCTAGAAAAATGAACCTTTTCCGGTTCTGC     | AtPAT12             | U67062 <sup>1</sup>                |
| PAT12rev  | AAAACCCGGGAGGGTTCGATGTCAGAACAAG        |                     |                                    |
| PAT13for  | AAAATCTAGAAAAATGGCGTGAACGTGTTCAAG      | AtPAT13             | U09586 <sup>1</sup>                |
| PAT13rev  | TTTTCCCGGGTAGAGACTGAAGCGGCTCTG         |                     |                                    |
| PAT14for  | TTTTTCTAGAAAAATGCATAGATCTGGTACAACAATG  | AtPAT14             | U19236 <sup>1</sup>                |
| PAT14rev  | AAAACCCGGGCTGGGAATCAAAGTCGGGTTTC       |                     |                                    |
| PAT15for  | TTTTTCTAGAAAAATGGGTTTCGTGTATTACGTCAC   | AtPAT15             | cDNA library                       |
| PAT15rev  | AAAACCCGGGGCTGTCTCTCGATGCAGAAAAG       |                     |                                    |
| PAT16for  | TTTTTCTAGATGAAAAATGAAACGGAAAGGAGTCGG   | AtPAT16             | U12747 <sup>1</sup>                |
| PAT16rev  | AAAACCCGGGATGTTTTGTTTCAGATGAATCAGG     |                     |                                    |
| PAT17for  | TTTTCTAGAAAAATGGCGGTACAGTGGCTTTTG      | AtPAT17             | pda19162 <sup>2</sup>              |
| PAT17rev  | AAAACCCGGGTTCGATTTTCGTTTTGATTTGTTG     |                     |                                    |
| PAT18for  | TTTTGCTAGCAAAATGTGTTACTGCTTTGTGCAG     | AtPAT18             | cDNA library                       |
| PAT18rev  | AAAACCCGGGTCTTGGTGATGCTTCACTTCC        |                     |                                    |
| PAT19for  | AAAATCTAGAAAAATGGTGAGGAAACATGGTTGG     | AtPAT19             | U25382 <sup>1</sup>                |
| PAT19rev  | TTTTCCCGGGCTTGCGGGTACCTACAGG           |                     |                                    |
| PAT20for  | TTTTGCTAGCAAAATGGTGAGGAAACACGGTTGG     | AtPAT20             | genomic DNA                        |
| PAT20rev  | AAAACCCGGGCTTGATGTTAGAACCGGTTTGG       |                     |                                    |
| PAT21for  | TTTTTCTAGAAAAATGGCGAGAAGACATGGATGG     | AtPAT21             | PENTR221<br>AT2G66340 <sup>1</sup> |
| PAT21rev  | AAAACCCGGGATGGAATCTAGTAGATAAATGTCTGTG  |                     |                                    |
| PAT22for  | TTTTGGATCCAAAATGAGGAAACATGGATGGCAG     | AtPAT22             | cDNA library                       |
| PAT22rev  | AAAACCCGGGTCTTGATTTGTGGATGTTTCTAG      |                     |                                    |
| PAT23for  | TTTTACTAGTTGAAAAATGGACTCATCAGAGATCGAAG | AtPAT23             | pollen cDNA <sup>3</sup>           |
| PAT23rev  | AAAACCTCGAGGAGAATTGAAGACGGGACAAC       |                     |                                    |
| PAT24for  | TTTTCTCGAGAAAAATGTCATCGGAGATTGAGGTG    | AtPAT24             | plasmid <sup>4</sup>               |
| PAT24rev  | AAAACCCGGGTGGAGATACAACAGGTCGGG         |                     |                                    |
| GFP5' rev | CAACAAGAATTGGGACAACCTCC                | AtPAT20             | <i>N. benthamiana</i> cDNA         |
| CNX1for   | TTTTACTAGTAGACAACGGCAACTATTTTCCG       | CNX1<br>(At5g61790) | cDNA library                       |
| CNX1rev   | AAAACCCGGGCTAATTATCACGTCTCGGTTGC       |                     |                                    |
| TPK1for   | TTTGGATCCATGTCGAGTGATGCAGCTC           | TPK1<br>(AT5G55630) | plasmid <sup>5</sup>               |
| TPK1rev   | TTTCTCGAGCCTTTGAATCTGAGACGTGG          |                     |                                    |
| GNT1for   | TTTTTCTAGAAAAATGGCGAGGATCTCGTGTG       | GNT1<br>(At4g38240) | plasmid <sup>6</sup>               |
| GNT1rev   | AAAACCCGGGGGAATTTTGAATTTCCAAGCTGC      |                     |                                    |

<sup>1</sup> Uxxxxx, Sxxxxx, PENTRxxx, clones obtained from the Arabidopsis stock centre

<sup>2</sup> pdaxxxxx or pdzxxxxx, clones obtained from RIKEN

<sup>3</sup> gift from D. Becker

<sup>4</sup> plasmid gift from P. Hemsley and C. Grierson

<sup>5</sup> plasmid previously used; **Batistic O, Waadt R, Steinhorst L, Held K, Kudla J (2010) CBL-mediated targeting of CIPKs facilitates the decoding of calcium signals emanating from distinct cellular stores. Plant J 61: 211-222**

Constructs published previously:

| Construct | Reference                                                                                                                                                                                                                |
|-----------|--------------------------------------------------------------------------------------------------------------------------------------------------------------------------------------------------------------------------|
| CBL1n.OFP | <b>Batistic O, Waadt R, Steinhorst L, Held K, Kudla J</b> (2010) CBL-mediated targeting of CIPKs facilitates the decoding of calcium signals emanating from distinct cellular stores. <i>Plant J</i> <b>61</b> : 211-222 |

Supplemental References:

**Kim J, Harter K, Theologis A** (1997) Protein-protein interactions among the AUX-IAA proteins. *Proc Natl Acad Sci USA* **94**: 11786-11791
